# Supplementary material
Source: Springer Nature journal article supplement (https://www.springermedizin.de/resource/supplementary/12990_2013_598_MOESM15_ESM.pdf/9613590)

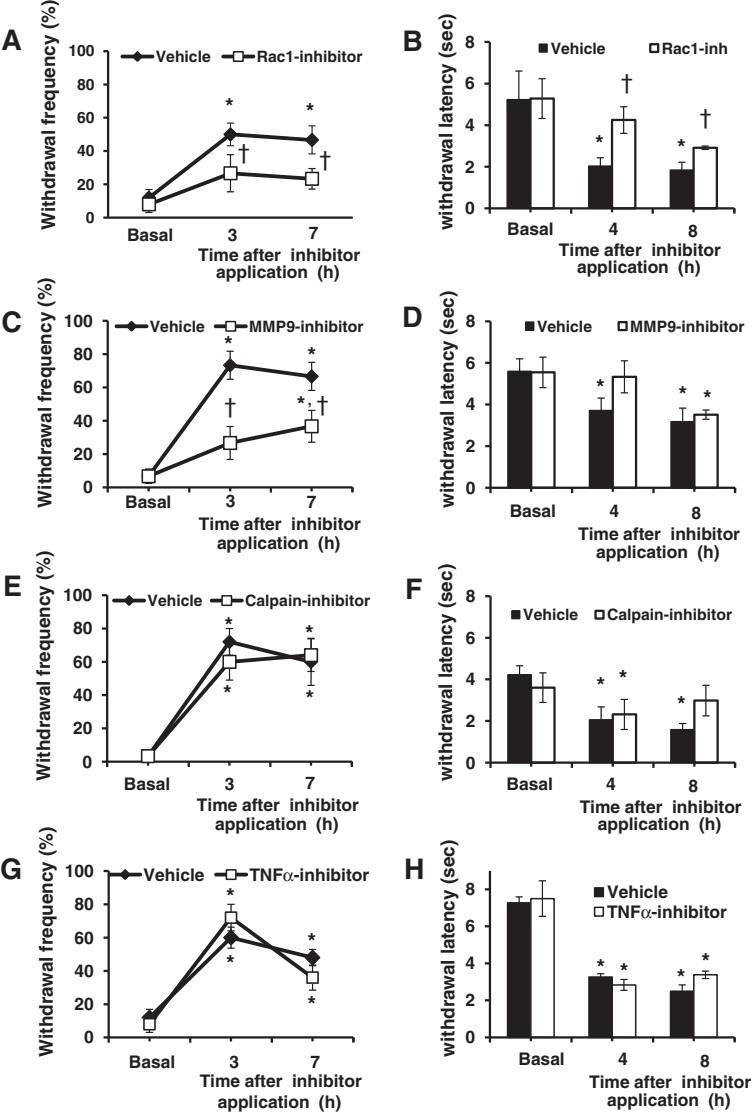

Supplement: MOESM15 [file 9613590]
